# Supplementary material
Source: ML conference proceedings conference paper supplement (https://openreview.net/forum?id=Nu3t6XX103)
Supplement: supplementary_material [file attachment]

---

# Model Merging by Gradient Matching

---

Anonymous Author(s)

Affiliation

Address

email

## 1 Appendix

### 2 1 Derivations

#### 3 1.1 Derivation of Task Arithmetic using Gradient Mismatch

4 We proceed by first writing the respective stationarity conditions for the LLM  $\theta_{\text{LLM}}$ , fine-tuned  
5 models  $\theta_t$ , and target model  $\theta_{1:T}$ ,

$$\begin{aligned}\theta_{\text{LLM}} &= -\nabla \bar{\ell}_{\text{LLM}}(\theta_{\text{LLM}}) \\ \mathbf{H}_0(\theta_t - \theta_{\text{LLM}}) &= -\nabla \bar{\ell}_t(\theta_t), \text{ for all } t = 1, 2, \dots, T \\ \mathbf{H}_0(\theta_{1:T} - \theta_{\text{LLM}}) &= \sum_{t=1}^T -\alpha_t \nabla \bar{\ell}_t(\theta_{1:T}).\end{aligned}$$

6 Next, we multiply the second equation with  $\alpha_t$  for each  $t$ , then sum it over  $t = 1, 2, \dots, T$ , and  
7 finally subtract it from the third equation to get the following,

$$\mathbf{H}_0(\theta_{1:T} - \theta_{\text{LLM}}) - \sum_{t=1}^T \alpha_t \mathbf{H}_0(\theta_t - \theta_{\text{LLM}}) = -\sum_{t=1}^T \alpha_t \left[ \nabla \bar{\ell}_t(\theta_{1:T}) - \nabla \bar{\ell}_t(\theta_t) \right]. \quad (1)$$

8 Multiplying by  $\mathbf{H}_0^{-1}$  and rearranging gives us

$$\theta_{1:T} = \underbrace{\theta_{\text{LLM}} + \sum_{t=1}^T \alpha_t (\theta_t - \theta_{\text{LLM}})}_{=\bar{\theta}_{\text{TA}}} - \sum_{t=1}^T \alpha_t \mathbf{H}_0^{-1} \underbrace{\left[ \nabla \bar{\ell}_t(\theta_{1:T}) - \nabla \bar{\ell}_t(\theta_t) \right]}_{\text{Gradient mismatch for } \theta_t \text{ on } \bar{\ell}_t}. \quad (2)$$

9 .

#### 10 1.2 Derivation of the New Method

11 By substituting Taylor’s approximation, the equation reduces to the first expression below which is  
12 linear in  $\theta_{1:T}$ ,

$$\theta_{1:T} - \theta_{\text{LLM}} \approx \sum_{t=1}^T \alpha_t (\theta_t - \theta_{\text{LLM}}) - \sum_{t=1}^T \alpha_t \mathbf{H}_0^{-1} [\mathbf{H}_t(\theta_{1:T} - \theta_t)]. \quad (3)$$

13 We then add and subtract  $\theta_{\text{LLM}}$  in the last term above,

$$\theta_{1:T} - \theta_{\text{LLM}} \approx \sum_{t=1}^T \alpha_t (\theta_t - \theta_{\text{LLM}}) - \sum_{t=1}^T \alpha_t \mathbf{H}_0^{-1} [\mathbf{H}_t(\theta_{1:T} - \theta_{\text{LLM}}) - \mathbf{H}_t(\theta_t - \theta_{\text{LLM}})], \quad (4)$$

14 and multiply the whole expression by  $\mathbf{H}_0$  and rearrange it to get the second expression in Eq. 3,

$$\begin{aligned} \left(\mathbf{H}_0 + \sum_{t=1}^T \alpha_t \mathbf{H}_t\right)(\boldsymbol{\theta}_{1:T} - \boldsymbol{\theta}_{\text{LLM}}) &\approx \sum_{t=1}^T \alpha_t \mathbf{H}_0(\boldsymbol{\theta}_t - \boldsymbol{\theta}_{\text{LLM}}) + \sum_{t=1}^T \alpha_t \mathbf{H}_t(\boldsymbol{\theta}_t - \boldsymbol{\theta}_{\text{LLM}}) \\ &= \sum_{t=1}^T \alpha_t (\mathbf{H}_0 + \mathbf{H}_t)(\boldsymbol{\theta}_t - \boldsymbol{\theta}_{\text{LLM}}). \end{aligned} \quad (5)$$

15 Multiplying the equation by inverse of  $\bar{\mathbf{H}} = \mathbf{H}_0 + \sum_{t=1}^T \alpha_t \mathbf{H}_t$  and taking  $\boldsymbol{\theta}_{\text{LLM}}$  to the right hand  
16 side gives us

$$\hat{\boldsymbol{\theta}}_{1:T} = \boldsymbol{\theta}_{\text{LLM}} + \sum_{t=1}^T \alpha_t (\bar{\mathbf{H}}^{-1} \mathbf{H}_{0+t})(\boldsymbol{\theta}_t - \boldsymbol{\theta}_{\text{LLM}}). \quad (6)$$

### 17 1.3 Derivation of Data Removal

18 Our target model is the following model trained using

$$\boldsymbol{\theta}_{\text{LLM}} = \arg \min_{\boldsymbol{\theta}} \bar{\ell}_{\text{LLM}}(\boldsymbol{\theta}) + \frac{1}{2} \delta \|\boldsymbol{\theta}\|^2, \text{ where } \bar{\ell}_{\text{LLM}}(\boldsymbol{\theta}) = \sum_{i \in \mathcal{D}_{\text{Large}}} \ell_i(\boldsymbol{\theta}). \quad (7)$$

19 but without using  $\mathcal{D}_t$ ,

$$\boldsymbol{\theta}_{\setminus t} = \arg \min_{\boldsymbol{\theta}} \bar{\ell}_{\setminus t}(\boldsymbol{\theta}) + \frac{\delta}{2} \|\boldsymbol{\theta}\|^2, \text{ where } \bar{\ell}_{\setminus t}(\boldsymbol{\theta}) = \sum_{i \in \{\mathcal{D}_{\text{Large}} \setminus \mathcal{D}_t\}} \ell_i(\boldsymbol{\theta}). \quad (8)$$

20 The LLM objective can then be written in terms of this objective:

$$\boldsymbol{\theta}_{\text{LLM}} = \arg \min_{\boldsymbol{\theta}} \bar{\ell}_{\setminus t}(\boldsymbol{\theta}) + \alpha_t \bar{\ell}_t(\boldsymbol{\theta}) + \frac{\delta}{2} \|\boldsymbol{\theta}\|^2, \quad (9)$$

21 where we assume that  $\bar{\ell}_t$  is multiplied by a constant  $\alpha_t$  in the original model.

22 As before, we can write the stationary conditions of  $\boldsymbol{\theta}_{\text{LLM}}$ ,  $\boldsymbol{\theta}_t$ , and  $\boldsymbol{\theta}_{\setminus t}$ , respectively:

$$\begin{aligned} \delta \boldsymbol{\theta}_{\text{LLM}} &= -\nabla \bar{\ell}_{\setminus t}(\boldsymbol{\theta}_{\text{LLM}}) - \alpha_t \nabla \bar{\ell}_t(\boldsymbol{\theta}_{\text{LLM}}), \\ \mathbf{H}_0(\boldsymbol{\theta}_t - \boldsymbol{\theta}_{\text{LLM}}) &= -\nabla \bar{\ell}_t(\boldsymbol{\theta}_t), \\ \delta \boldsymbol{\theta}_{\setminus t} &= -\nabla \bar{\ell}_{\setminus t}(\boldsymbol{\theta}_{\setminus t}). \end{aligned} \quad (10)$$

23 Because our goal is to analyze  $\boldsymbol{\theta}_{\setminus t} - \alpha_t(\boldsymbol{\theta}_{\text{LLM}} - \boldsymbol{\theta}_t)$ , we multiply the second equation by  $\alpha_t$ , subtract  
24 it from the first equation, and then subtract the resultant from the third equation to get, the following,

$$\delta(\boldsymbol{\theta}_{\setminus t} - \boldsymbol{\theta}_{\text{LLM}}) + \alpha_t \mathbf{H}_0(\boldsymbol{\theta}_t - \boldsymbol{\theta}_{\text{LLM}}) = -[\nabla \bar{\ell}_{\setminus t}(\boldsymbol{\theta}_{\setminus t}) - \nabla \bar{\ell}_{\setminus t}(\boldsymbol{\theta}_{\text{LLM}})] + \alpha_t [\nabla \bar{\ell}_t(\boldsymbol{\theta}_{\text{LLM}}) - \nabla \bar{\ell}_t(\boldsymbol{\theta}_t)]. \quad (11)$$

25 We can now use Taylor's approximation to reduce gradient matching,

$$\nabla \bar{\ell}_{\setminus t}(\boldsymbol{\theta}_{\setminus t}) \approx \nabla \bar{\ell}_{\setminus t}(\boldsymbol{\theta}_{\text{LLM}}) + \nabla^2 \bar{\ell}_{\setminus t}(\boldsymbol{\theta}_{\text{LLM}})(\boldsymbol{\theta}_{\setminus t} - \boldsymbol{\theta}_{\text{LLM}}).$$

26 For the second gradient term, we do not need to use the Taylor's approximation because it does not  
27 depend on  $\boldsymbol{\theta}_{\setminus t}$ , but our goal is to improve over task arithmetic, so we do it to derive a preconditioner,

$$\nabla \bar{\ell}_t(\boldsymbol{\theta}_{\text{LLM}}) \approx \nabla \bar{\ell}_t(\boldsymbol{\theta}_t) + \mathbf{H}_t(\boldsymbol{\theta}_{\text{LLM}} - \boldsymbol{\theta}_t). \quad (12)$$

28 Note that it is also possible to do the Taylor's approximation not around  $\boldsymbol{\theta}_t$  but  $\boldsymbol{\theta}_{\text{LLM}}$ . Plugging these  
29 in Eq. 11, we can write,

$$\begin{aligned} \delta(\boldsymbol{\theta}_{\setminus t} - \boldsymbol{\theta}_{\text{LLM}}) + \alpha_t \mathbf{H}_0(\boldsymbol{\theta}_t - \boldsymbol{\theta}_{\text{LLM}}) &= -\nabla^2 \bar{\ell}_{\setminus t}(\boldsymbol{\theta}_{\text{LLM}})(\boldsymbol{\theta}_{\setminus t} - \boldsymbol{\theta}_{\text{LLM}}) + \alpha_t [\mathbf{H}_t(\boldsymbol{\theta}_{\text{LLM}} - \boldsymbol{\theta}_t)] \\ \implies [\delta \mathbf{I} + \nabla^2 \bar{\ell}_{\setminus t}(\boldsymbol{\theta}_{\text{LLM}})](\boldsymbol{\theta}_{\setminus t} - \boldsymbol{\theta}_{\text{LLM}}) &= -\alpha_t (\mathbf{H}_0 + \mathbf{H}_t)(\boldsymbol{\theta}_t - \boldsymbol{\theta}_{\text{LLM}}) \\ \implies \boldsymbol{\theta}_{\setminus t} = \boldsymbol{\theta}_{\text{LLM}} - \alpha_t [\delta \mathbf{I} + \nabla^2 \bar{\ell}_{\setminus t}(\boldsymbol{\theta}_{\text{LLM}})]^{-1} (\mathbf{H}_0 + \mathbf{H}_t)(\boldsymbol{\theta}_t - \boldsymbol{\theta}_{\text{LLM}}) \end{aligned}$$

30 which gives us the desired update of

$$\hat{\boldsymbol{\theta}}_{\setminus t} = \boldsymbol{\theta}_{\text{LLM}} - \alpha_t \bar{\mathbf{H}}_{\setminus t}^{-1} \mathbf{H}_{0+t}(\boldsymbol{\theta}_t - \boldsymbol{\theta}_{\text{LLM}}), \quad (13)$$

### 31 1.4 Proof that our update for data-removal is exact for linear regression

32 The task removal update derived above is closely related to previous works on data removal. For  
 33 instance, for linear model, our update recovers the popular influence function. We will now show this.  
 34 Consider a large linear model (coincidentally also abbreviated as LLM) with full data  $\mathcal{D} = (\mathbf{X}, \mathbf{y})$   
 35 where  $\mathbf{y}$  is a vector of outputs and  $\mathbf{X}$  is a matrix containing each feature vector as a row. The loss is  
 36  $\bar{\ell}_{\text{LLM}}(\boldsymbol{\theta}) = \frac{1}{2} \|\mathbf{y} - \mathbf{X}\boldsymbol{\theta}\|^2$ . Now, suppose we want to remove  $\mathcal{D}_t = (\mathbf{X}_t, \mathbf{y}_t)$  from it. Then, we have a  
 37 closed form solution for the full model and the model with removed data,

$$\boldsymbol{\theta}_{\text{LLM}} = \bar{\mathbf{H}}^{-1} \mathbf{X}^\top \mathbf{y}, \quad \boldsymbol{\theta}_{\setminus t} = \bar{\mathbf{H}}_{\setminus t}^{-1} \mathbf{X}^\top \mathbf{y},$$

38 where  $\bar{\mathbf{H}} = \nabla^2 \left[ \frac{1}{2} \|\mathbf{y} - \mathbf{X}\boldsymbol{\theta}\|^2 + \frac{1}{2} \|\boldsymbol{\theta}\|^2 \right] = \mathbf{X}^\top \mathbf{X} + \delta \mathbf{I}$ , and similarly  $\bar{\mathbf{H}}_{\setminus t} = \mathbf{X}_{\setminus t}^\top \mathbf{X}_{\setminus t} + \delta \mathbf{I}$ . A well  
 39 known result in the influence function literature Cook (1977) is that the two quantities are related as

$$\boldsymbol{\theta}_{\setminus t} - \boldsymbol{\theta}_{\text{LLM}} = \bar{\mathbf{H}}_{\setminus t}^{-1} \mathbf{X}_t^\top (\mathbf{X}_t \boldsymbol{\theta}_{\text{LLM}} - \mathbf{y}_t). \quad (14)$$

40 We will now show that our previously proposed update reduces to this for linear models.

41 We start with an expression for  $\boldsymbol{\theta}_t$  trained using

$$\boldsymbol{\theta}_t = \arg \min_{\boldsymbol{\theta}} \bar{\ell}_t(\boldsymbol{\theta}) + \frac{1}{2} \|\boldsymbol{\theta} - \boldsymbol{\theta}_{\text{LLM}}\|_{\mathbf{H}_0}^2, \quad (15)$$

42 but with the loss  $\bar{\ell}_t(\boldsymbol{\theta}) = \frac{1}{2} \|\mathbf{y}_t - \mathbf{X}_t \boldsymbol{\theta}\|^2$ . Using the second equation in the optimality condition of  
 43 Eq. 10, we can write:

$$\mathbf{H}_0(\boldsymbol{\theta}_t - \boldsymbol{\theta}_{\text{LLM}}) = \mathbf{X}_t^\top (\mathbf{y}_t - \mathbf{X}_t \boldsymbol{\theta}_t) \quad \implies \quad (\mathbf{H}_0 + \mathbf{H}_t) \boldsymbol{\theta}_t = \mathbf{H}_0 \boldsymbol{\theta}_{\text{LLM}} + \mathbf{X}_t^\top \mathbf{y}_t$$

44 where we use the fact that for linear models  $\mathbf{H}_t = \mathbf{X}_t^\top \mathbf{X}_t$ . We now simplify our update of Eq. 13  
 45 with  $\alpha_t = 1$  where we use the above relationship in the third line below,

$$\begin{aligned} \hat{\boldsymbol{\theta}}_{\setminus t} &= \boldsymbol{\theta}_{\text{LLM}} - \bar{\mathbf{H}}_{\setminus t}^{-1} (\mathbf{H}_0 + \mathbf{H}_t) (\boldsymbol{\theta}_t - \boldsymbol{\theta}_{\text{LLM}}) \\ &= \boldsymbol{\theta}_{\text{LLM}} - \bar{\mathbf{H}}_{\setminus t}^{-1} [(\mathbf{H}_0 + \mathbf{H}_t) \boldsymbol{\theta}_t - (\mathbf{H}_0 + \mathbf{H}_t) \boldsymbol{\theta}_{\text{LLM}}] \\ &= \boldsymbol{\theta}_{\text{LLM}} - \bar{\mathbf{H}}_{\setminus t}^{-1} (\mathbf{H}_0 \boldsymbol{\theta}_{\text{LLM}} + \mathbf{X}_t^\top \mathbf{y}_t - (\mathbf{H}_0 + \mathbf{H}_t) \boldsymbol{\theta}_{\text{LLM}}) \\ &= \boldsymbol{\theta}_{\text{LLM}} - \bar{\mathbf{H}}_{\setminus t}^{-1} (\mathbf{X}_t^\top \mathbf{y}_t - \mathbf{H}_t \boldsymbol{\theta}_{\text{LLM}}) \\ &= \boldsymbol{\theta}_{\text{LLM}} - \bar{\mathbf{H}}_{\setminus t}^{-1} (\mathbf{X}_t^\top \mathbf{y}_t - \mathbf{X}_t^\top \mathbf{X}_t \boldsymbol{\theta}_{\text{LLM}}) \\ &= \boldsymbol{\theta}_{\text{LLM}} + \bar{\mathbf{H}}_{\setminus t}^{-1} \mathbf{X}_t^\top (\mathbf{X}_t \boldsymbol{\theta}_{\text{LLM}} - \mathbf{y}_t). \end{aligned} \quad (16)$$

46 Therefore, our update reduces to Eq. 14.

47 A generalization of Eq. 14 to neural network is considered in Koh & Liang (2017) for the case of  
 48 one-example removal. Their approach when applied to remove multiple examples at once reduces to

$$\hat{\boldsymbol{\theta}}_{\setminus t} = \boldsymbol{\theta}_{\text{LLM}} + \bar{\mathbf{H}}_{\setminus t}^{-1} \mathbf{g}_t,$$

49 where  $\mathbf{g}_t = \nabla \bar{\ell}_t(\boldsymbol{\theta}_{\text{LLM}})$ . Our approach also recovers this result if we do not use the second Taylor's  
 50 approximation for the second gradient matching term in Eq. 11. Essentially, this removes the  
 51 contribution of the fine-tuned model and the steps are completely based on  $\boldsymbol{\theta}_{\text{LLM}}$ . It is not clear which  
 52 approach is better but in practice it may depend on the fine-tune process which by doing multiple  
 53 gradient steps may be able to get more information than a single gradient step  $\mathbf{g}_t$ . We hope to explore  
 54 this point in a future study.

### 55 1.5 Gradient Mismatch Reduction as Uncertainty Estimation

56 Both the gradient-mismatch connection and the new method are closely related to uncertainty  
 57 estimation via approximate Bayesian methods. We show that

$$\boldsymbol{\theta}_{1:T} = \underbrace{\boldsymbol{\theta}_{\text{LLM}} + \sum_{t=1}^T \alpha_t (\boldsymbol{\theta}_t - \boldsymbol{\theta}_{\text{LLM}})}_{=\boldsymbol{\theta}_{\text{TA}}} - \sum_{t=1}^T \alpha_t \mathbf{H}_0^{-1} \underbrace{[\nabla \bar{\ell}_t(\boldsymbol{\theta}_{1:T}) - \nabla \bar{\ell}_t(\boldsymbol{\theta}_t)]}_{\text{Gradient mismatch for } \boldsymbol{\theta}_t \text{ on } \bar{\ell}_t}. \quad (17)$$

58 is equivalent to a maximum-a-posteriori (MAP) estimate of the posterior over all data  $\mathcal{D}_{1:T}$  while

$$\hat{\boldsymbol{\theta}}_{1:T} = \boldsymbol{\theta}_{\text{LLM}} + \sum_{t=1}^T \alpha_t (\bar{\mathbf{H}}^{-1} \mathbf{H}_{0+t}) (\boldsymbol{\theta}_t - \boldsymbol{\theta}_{\text{LLM}}), \quad (18)$$

59 is the same but for a posterior approximation obtained with Laplace’s method (Laplace, 1774; Tierney  
60 & Kadane, 1986; MacKay, 1992). Based on these, we discuss some possible future directions for  
61 improvements.

62 We start by defining the posteriors. Assuming  $p(\boldsymbol{\theta}) = \mathcal{N}(\boldsymbol{\theta} | \boldsymbol{\theta}_{\text{LLM}}, \mathbf{H}_0^{-1})$  to be the Gaussian prior and  
63  $p(\mathcal{D}_t | \boldsymbol{\theta}) \propto e^{-\bar{\ell}_t(\boldsymbol{\theta})}$  to be a valid likelihood function, we can define a weighted-posterior  $p_\alpha(\boldsymbol{\theta} | \mathcal{D}_{1:T})$   
64 over all datasets, shown below, along with an approximation obtained by Laplace’s method,

$$p_\alpha(\boldsymbol{\theta} | \mathcal{D}_{1:T}) \propto p(\boldsymbol{\theta}) \prod_{t=1}^T e^{-\alpha_t \bar{\ell}_t(\boldsymbol{\theta})} \approx p(\boldsymbol{\theta}) \prod_{t=1}^T e^{-\frac{1}{2} \alpha_t \|\boldsymbol{\theta} - \boldsymbol{\theta}_t\|_{\mathbf{H}_t}^2} \propto q_\alpha(\boldsymbol{\theta} | \mathcal{D}_{1:T}). \quad (19)$$

65 Here, we use a second-order approximation at  $\boldsymbol{\theta}_t$  to get  $\bar{\ell}_t(\boldsymbol{\theta}) \approx \bar{\ell}_t(\boldsymbol{\theta}_t) + \frac{1}{2} \|\boldsymbol{\theta} - \boldsymbol{\theta}_t\|_{\mathbf{H}_t}^2$ . The term  
66  $\bar{\ell}_t(\boldsymbol{\theta}_t)$  is an irrelevant constant and we get the approximation  $q_\alpha(\boldsymbol{\theta} | \mathcal{D}_{1:T})$ . The result below shows  
67 that the merged model is the MAP estimate corresponding to the approximate posterior.

68 **Theorem 1** *The gradient mismatch equation in Eq. 2 is the stationarity condition of a MAP problem*  
69 *written in terms of posterior  $p(\mathcal{D}_t | \boldsymbol{\theta})$  (the equation on the left), while the merged model  $\hat{\boldsymbol{\theta}}_{1:T}$  in*  
70 *Eq. 18 is the MAP estimate of the Laplace approximation (equation on the right).*

$$\boldsymbol{\theta}_{1:T} = \arg \max_{\boldsymbol{\theta}} p(\boldsymbol{\theta}) \prod_{t=1}^D \left[ \frac{p(\boldsymbol{\theta} | \mathcal{D}_t)}{p(\boldsymbol{\theta})} \right]^{\alpha_t}, \quad \hat{\boldsymbol{\theta}}_{1:T} = \arg \max_{\boldsymbol{\theta}} q_\alpha(\boldsymbol{\theta} | \mathcal{D}_{1:T}). \quad (20)$$

71 A detailed proof is given in Sec. 1.6. The result relates the gradient-mismatch approach to the  
72 posterior distribution and its approximation. The first equation expresses model merging as merging  
73 of posteriors  $p(\boldsymbol{\theta} | \mathcal{D}_t)$  that are computed on different datasets. With a Bayesian approach, an exact  
74 solution can be recovered even when training on separate datasets. This is an instance of the Bayesian  
75 committee machine (Tresp, 2000) or Bayesian data fusion (Mutambara, 1998; Durrant-Whyte, 2001;  
76 Wu et al., 2022) which are extensively used for Gaussian processes (Deisenroth & Ng, 2015) and  
77 which should also be useful when using Neural Tangent Kernel for model merging (Ortiz-Jimenez  
78 et al., 2023). The second equation connects existing methods to a Gaussian approximation obtained  
79 using Laplace’s method.

80 The gradient mismatch term in Eq. 2 arises due to the ratio  $p(\boldsymbol{\theta} | \mathcal{D}_t) / p(\boldsymbol{\theta})$ . To understand this,  
81 consider the simple case of linear regression. Suppose we learn two separate linear models with  
82 loss function  $\bar{\ell}_t(\boldsymbol{\theta}) = \frac{1}{2} \|\mathbf{y}_t - \mathbf{X}_t \boldsymbol{\theta}\|^2$ . The gradient and Hessian are  $\nabla \bar{\ell}_t(\boldsymbol{\theta}) = \mathbf{X}_t^\top (\mathbf{X}_t \boldsymbol{\theta} - \mathbf{y}_t)$  and  
83  $\mathbf{H}_t = \mathbf{X}_t \mathbf{X}_t^\top$  respectively. Therefore, the gradient mismatch term can be written as,

$$\nabla \bar{\ell}_t(\boldsymbol{\theta}_{1:T}) - \nabla \bar{\ell}_t(\boldsymbol{\theta}_t) = \mathbf{X}_t^\top (\mathbf{X}_t \boldsymbol{\theta}_{1:T} - \mathbf{X}_t \boldsymbol{\theta}_t) = \mathbf{H}_t (\boldsymbol{\theta}_{1:T} - \boldsymbol{\theta}_t) = \nabla \log \frac{p(\boldsymbol{\theta} | \mathcal{D}_t)}{p(\boldsymbol{\theta})} \Big|_{\boldsymbol{\theta} = \boldsymbol{\theta}_{1:T}}.$$

84 For linear models,  $p_\alpha(\boldsymbol{\theta} | \mathcal{D}_t) = q_\alpha(\boldsymbol{\theta} | \mathcal{D}_t)$  and therefore Taylor’s approximation

$$\nabla \bar{\ell}_t(\boldsymbol{\theta}) \approx \nabla \bar{\ell}_t(\boldsymbol{\theta}_t) + \mathbf{H}_t (\boldsymbol{\theta} - \boldsymbol{\theta}_t) \quad (21)$$

85 is exact. The equation matches Jin et al. (2023, Eq. 1) who use this objective to merge linear parts of  
86 a transformer. Our approach extends such efforts to nonlinear problems.

87 The Bayesian connection also gives direct ways to improve model merging and also reduce the  
88 computational burden. For example, one way to improve would be to take a few optimization steps  
89 aiming for the MAP estimate of the exact posterior, and then use the current iterate for the Taylor’s  
90 approximation in Eq. 2. Solutions obtained this way will provably get better as the number of  
91 steps are increased. This is in contrast with other approaches, for example, by Ortiz-Jimenez et al.  
92 (2023) who propose to train in the linearized tangent space which may not always converge to the  
93 right solution. Another way to improve is to use better posterior approximation, for example, using  
94 variational inference (Graves, 2011; Blundell et al., 2015; Osawa et al., 2019) which is known to  
95 yield a more global approximation (Opper & Archambeau, 2009). Nevertheless, in this work we

96 focus on improving merging without retraining and with computationally cheap estimates and leave  
 97 the iterative optimization as future work.

98 The Bayesian view also connects to similar efforts in continual learning to avoid catastrophic  
 99 forgetting (Kirkpatrick et al., 2017) where a Bayesian motivation is used to justify the choice of  
 100 Fisher-based regularizer (Huszár, 2018). Our contribution essentially gives an extension of such  
 101 ideas to model merging. Our approach is also connected to Knowledge-Adaptation priors (Khan  
 102 & Swaroop, 2021) where a variety of adaptation tasks are solved by gradient reconstruction. The  
 103 connection also justifies the choice of diagonal Fisher in place of the Hessian, which essentially  
 104 forms a Generalized Gauss-Newton approximation (Schraudolph, 2002; Pascanu & Bengio, 2013;  
 105 Martens, 2020) of it. In our experiments, we use a Monte-Carlo estimator  $\sum_i [\nabla_{\theta} \ell_i(\theta)]^2$  of the  
 106 diagonal Fisher where  $i$  is summed over all examples in the data. Such estimates can also be obtained  
 107 during training with Adam (Kingma & Ba, 2015) and provide a good estimate of the Hessian for  
 108 small minibatch sizes (Khan et al., 2018, Thm. 1). The estimate can be normalized or unnormalized,  
 109 and it is also possible to use another Fisher estimate. However, our derivation suggests to estimate it  
 110 on the training data and not a held-out set as mentioned in Yadav et al. (2023).

## 111 1.6 Derivation of Model Merging as MAP of Bayes’ Posterior

112 We will now connect our approach to Bayes’ rule for linear regression. In this case, Eq. 2 can be  
 113 rearranged to write as follows, where in the second term we have added and subtracted  $\theta_{1:T}$ ,

$$0 = -\mathbf{H}_0(\theta_{1:T} - \theta_{\text{LLM}}) + \sum_{t=1}^T \alpha_t \mathbf{H}_0(\theta_t - \theta_{1:T} + \theta_{1:T} - \theta_{\text{LLM}}) - \sum_{t=1}^T \alpha_t \mathbf{H}_t(\theta_{1:T} - \theta_t).$$

114 This equation is a stationarity condition of the following optimization problem,

$$\theta_{1:T} = \arg \min_{\theta} \left( 1 - \sum_{t=1}^T \alpha_t \right) \underbrace{\left[ -\frac{1}{2} \|\theta - \theta_{\text{LLM}}\|_{\mathbf{H}_0}^2 \right]}_{=\log p(\theta)} + \sum_{t=1}^T \alpha_t \underbrace{\left( -\frac{1}{2} \|\theta - \theta_t\|_{\mathbf{H}_0 + \mathbf{H}_t}^2 \right)}_{=\log p(\theta|\mathcal{D}_t)}.$$

115 where we identify the prior to be  $p(\theta) = \mathcal{N}(\theta|\theta_{\text{LLM}}, \mathbf{H}_0^{-1})$ , and the posterior on  $\mathcal{D}_t$  to be  $p(\theta|\mathcal{D}_t) =$   
 116  $\mathcal{N}(\theta|\theta_t, (\mathbf{H}_0 + \mathbf{H}_t)^{-1})$ . We can therefore show that the stationarity condition corresponds to a  
 117 maximum-a-posterior estimate of  $p(\theta|\mathcal{D}_{1:T})$  as follows,

$$p(\theta|\mathcal{D}_{1:T}) \propto p(\theta) \prod_{t=1}^D p(\mathcal{D}_t|\theta)^{\alpha_t} = p(\theta) \prod_{t=1}^D \left[ \frac{p(\theta|\mathcal{D}_t)}{p(\theta)} \right]^{\alpha_t} = p(\theta)^{1 - \sum_{t=1}^T \alpha_t} \prod_{t=1}^T p(\theta|\mathcal{D}_t)^{\alpha_t},$$

118 where log of the last term is equivalent to the objective function.

## 119 References

- 120 Charles Blundell, Julien Cornebise, Koray Kavukcuoglu, and Daan Wierstra. Weight uncertainty in  
 121 neural network. In *International Conference on Machine Learning (ICML)*, 2015. pages 4
- 122 R Dennis Cook. Detection of influential observation in linear regression. *Technometrics*, 19(1):15–18,  
 123 1977. pages 3
- 124 Marc Deisenroth and Jun Wei Ng. Distributed gaussian processes. In *International Conference on*  
 125 *Machine Learning*, pp. 1481–1490. PMLR, 2015. pages 4
- 126 Hugh Durrant-Whyte. Data fusion in decentralised sensing networks. In *Fourth International*  
 127 *Conference on Information Fusion, 2001*, 2001. pages 4
- 128 Alex Graves. Practical variational inference for neural networks. In *Advances in Neural Information*  
 129 *Processing Systems (NeurIPS)*, 2011. pages 4
- 130 Ferenc Huszár. Note on the quadratic penalties in elastic weight consolidation. *Proceedings of the*  
 131 *National Academy of Sciences*, 115(11):E2496–E2497, 2018. pages 5
- 132 Xisen Jin, Xiang Ren, Daniel Preotiuc-Pietro, and Pengxiang Cheng. Dataless knowledge fusion by  
 133 merging weights of language models. In *International Conference on Learning Representations*  
 134 *(ICLR)*, 2023. URL <https://openreview.net/forum?id=FCnohuR6AnM>. pages 4

- 135 Mohammad Emtiyaz Khan and Siddharth Swaroop. Knowledge-adaptation priors. In *Advances in*  
136 *Neural Information Processing Systems (NeurIPS)*, 2021. pages 5
- 137 Mohammad Emtiyaz Khan, Didrik Nielsen, Voot Tangkaratt, Wu Lin, Yarin Gal, and Akash Srivas-  
138 tava. Fast and scalable bayesian deep learning by weight-perturbation in adam. In *International*  
139 *Conference on Machine Learning (ICML)*, 2018. pages 5
- 140 Diederik P. Kingma and Jimmy Ba. Adam: A method for stochastic optimization. In *International*  
141 *Conference on Learning Representations (ICLR)*, 2015. pages 5
- 142 James Kirkpatrick, Razvan Pascanu, Neil Rabinowitz, Joel Veness, Guillaume Desjardins, Andrei A  
143 Rusu, Kieran Milan, John Quan, Tiago Ramalho, Agnieszka Grabska-Barwinska, Demis Hassabis,  
144 Claudia Clopath, Dharshan Kumaran, and Raia Hadsell. Overcoming catastrophic forgetting in  
145 neural networks. *Proceedings of the National Academy of Sciences (PNAS)*, 114(13):3521–3526,  
146 2017. pages 5
- 147 Pang Wei Koh and Percy Liang. Understanding black-box predictions via influence functions. In  
148 *International Conference on Machine Learning (ICML)*, 2017. pages 3
- 149 Pierre-Simon Laplace. Mémoires de mathématique et de physique. *Tome Sixieme*, 1774. pages 4
- 150 David JC MacKay. A practical Bayesian framework for backpropagation networks. *Neural Computa-*  
151 *tion*, 4(3):448–472, 1992. pages 4
- 152 James Martens. New insights and perspectives on the natural gradient method. *J. Mach. Learn. Res.*  
153 *(JMLR)*, 21(1):5776–5851, 2020. pages 5
- 154 Arthur G. O. Mutambara. *Decentralized estimation and control for multisensor systems*. Routledge,  
155 1998. pages 4
- 156 Manfred Opper and Cédric Archambeau. The variational Gaussian approximation revisited. *Neural*  
157 *computation*, 21(3):786–792, 2009. pages 4
- 158 Guillermo Ortiz-Jimenez, Alessandro Favero, and Pascal Frossard. Task arithmetic in the tangent  
159 space: Improved editing of pre-trained models, 2023. URL [http://arxiv.org/abs/2305.](http://arxiv.org/abs/2305.12827)  
160 [12827](http://arxiv.org/abs/2305.12827). arXiv:2305.12827. pages 4
- 161 Kazuki Osawa, Siddharth Swaroop, Mohammad Emtiyaz Khan, Anirudh Jain, Runa Eschenhagen,  
162 Richard E Turner, and Rio Yokota. Practical deep learning with Bayesian principles. In *Advances*  
163 *in Neural Information Processing Systems (NeurIPS)*, 2019. pages 4
- 164 Razvan Pascanu and Yoshua Bengio. Revisiting natural gradient for deep networks, 2013. URL  
165 <http://arxiv.org/abs/1301.3584>. arXiv:1301.3584. pages 5
- 166 Nicol N Schraudolph. Fast curvature matrix-vector products for second-order gradient descent.  
167 *Neural Computation*, 14(7):1723–1738, 2002. pages 5
- 168 Luke Tierney and Joseph B Kadane. Accurate approximations for posterior moments and marginal  
169 densities. *Journal of the American Statistical Association*, 81(393):82–86, 1986. pages 4
- 170 Volker Tresp. A Bayesian committee machine. *Neural Computation*, 12(11):2719–2741, 2000. pages  
171 4
- 172 Peng Wu, Tales Imbiriba, Victor Elvira, and Pau Closas. Bayesian data fusion with shared priors,  
173 2022. URL <http://arxiv.org/abs/2212.07311>. arXiv:2212.07311. pages 4
- 174 Prateek Yadav, Derek Tam, Leshem Choshen, Colin Raffel, and Mohit Bansal. Resolving interference  
175 when merging models, 2023. URL <http://arxiv.org/abs/2306.01708>. arXiv:2306.01708.  
176 pages 5
